# Supplementary material
Source: MDPI journal article supplement (https://www.mdpi.com/1424-8247/14/12/1261)
Supplement: s1 [file s1]

Supplementary Table S1. Italian macro-regions, regions and number of inhabitants, including the study's site (Campania Region in bold)

| Italian macro-regions | Italian regions       | Inhabitants (Update to January 2021) |
|-----------------------|-----------------------|--------------------------------------|
| Northern Italy        | Lombardia             | 9.966.992                            |
| Central Italy         | Lazio                 | 5.720.796                            |
| <b>Southern Italy</b> | <b>Campania</b>       | <b>5.679.759</b>                     |
| Northern Italy        | Veneto                | 4.852.453                            |
| Italian islands       | Sicilia               | 4.840.876                            |
| Northern Italy        | Emilia-Romagna        | 4.445.549                            |
| Northern Italy        | Piemonte              | 4.273.210                            |
| Southern Italy        | Puglia                | 3.926.931                            |
| Central Italy         | Toscana               | 3.668.333                            |
| Southern Italy        | Calabria              | 1.877.728                            |
| Italian islands       | Sardegna              | 1.598.225                            |
| Northern Italy        | Liguria               | 1.509.805                            |
| Central Italy         | Marche                | 1.501.406                            |
| Southern Italy        | Abruzzo               | 1.285.256                            |
| Northern Italy        | Friuli-Venezia Giulia | 1.198.753                            |
| Northern Italy        | Trentino Alto Adige   | 1.078.460                            |
| Central Italy         | Umbria                | 865.013                              |
| Southern Italy        | Basilicata            | 547.579                              |
| Southern Italy        | Molise                | 296.547                              |
| Northern Italy        | Valle d'Aosta         | 123.895                              |

Source: *dati.istat.it*
